# Supplementary material for: Molecular Basis for Lytic Bacteriophage Resistance in Enterococci
Source: PubMed Central journal article supplement (PMC4999554; doi:10.1128/mbio.01304-16), 2016-08-30

Figure S2

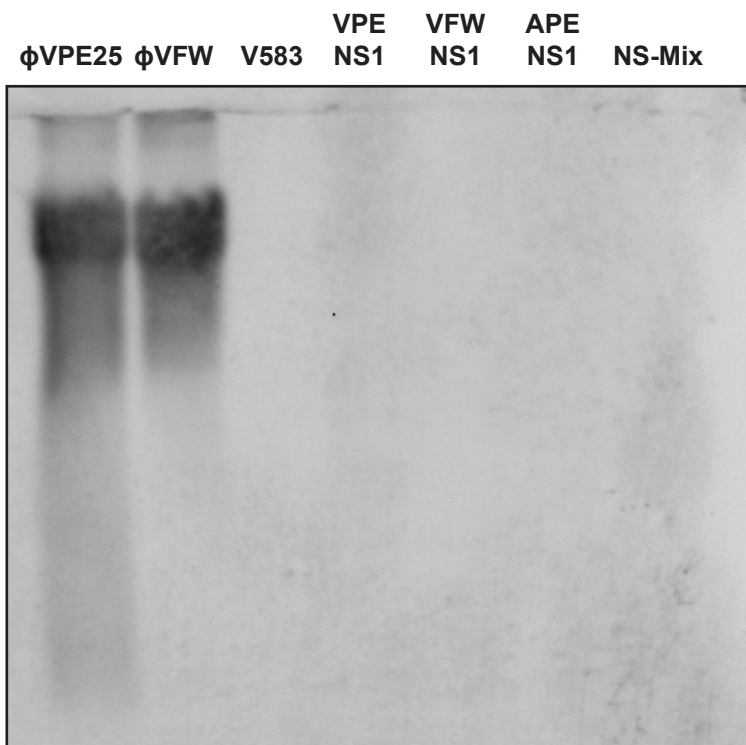

Supplement: mbo004162963sf2.pdf [file mbo004162963sf2.pdf]
