# Supplementary material for: Molecular Basis for Lytic Bacteriophage Resistance in Enterococci
Source: PubMed Central journal article supplement (PMC4999554; doi:10.1128/mbio.01304-16), 2016-08-30
Supplement: mbo004162963st1.pdf [file mbo004162963st1.pdf]

**Table S1. Enterococcal bacteriophage genome organization and features**

**ϕVPE25 genome annotation**

| Feature ID | Gene Start | Gene Stop | Strand | blastp Best-Hit cut-off (0.001)                                | Best-Hit<br>Accession<br>Number | %Identity<br>/Similarity<br>/Gaps | E-value   | RAST Function Prediction                                                         |
|------------|------------|-----------|--------|----------------------------------------------------------------|---------------------------------|-----------------------------------|-----------|----------------------------------------------------------------------------------|
| orf_1      | 1033       | 1239      | +      | None                                                           |                                 |                                   |           | hypothetical protein                                                             |
| orf_2      | 1243       | 2841      | +      | None                                                           |                                 |                                   |           | hypothetical protein                                                             |
| orf_3      | 2927       | 4882      | +      | hypothetical protein [Weissella oryzae]                        | WP_027699<br>797                | 35/55/50                          | 8.00E-105 | RecD-like DNA helicase YrrC                                                      |
| orf_4      | 4860       | 5387      | +      | None                                                           |                                 |                                   |           | hypothetical protein                                                             |
| orf_5      | 5826       | 6137      | +      | None                                                           |                                 |                                   |           | hypothetical protein                                                             |
| orf_6      | 6134       | 6571      | +      | None                                                           |                                 |                                   |           | hypothetical protein                                                             |
| orf_7      | 6571       | 6825      | +      | None                                                           |                                 |                                   |           | hypothetical protein                                                             |
| orf_8      | 6828       | 7064      | +      | None                                                           |                                 |                                   |           | hypothetical protein                                                             |
| orf_9      | 7097       | 8383      | +      | ATP-dependent DNA ligase [Bacillus subtilis]                   | WP_020846<br>136                | 35/58/20                          | 8.00E-68  | DNA ligase, phage-associated                                                     |
| orf_10     | 8399       | 8590      | +      | None                                                           |                                 |                                   |           | hypothetical protein                                                             |
| orf_11     | 8753       | 8968      | +      | None                                                           |                                 |                                   |           | hypothetical protein                                                             |
| orf_12     | 9057       | 9260      | +      | None                                                           |                                 |                                   |           | hypothetical protein                                                             |
| orf_13     | 9281       | 9493      | +      | None                                                           |                                 |                                   |           | hypothetical protein                                                             |
| orf_14     | 9477       | 9887      | +      | None                                                           |                                 |                                   |           | hypothetical protein                                                             |
| orf_15     | 9984       | 10532     | +      | Rossmann fold nucleotide-binding protein [Enterococcus durans] | WP_005877<br>211                | 45/64/6                           | 2.00E-42  | Lysine decarboxylase family                                                      |
| orf_16     | 10529      | 10717     | +      | None                                                           |                                 |                                   |           | hypothetical protein                                                             |
| orf_17     | 10718      | 11344     | +      | nucleoside deoxyribosyltransferase [Lactococcus lactis]        | WP_014573<br>106                | 49/66/4                           | 7.00E-42  | Purine trans deoxyribosylase (Nucleoside deoxyribosyltransferase-I) (EC 2.4.2.6) |
| orf_18     | 11435      | 12271     | +      | gp051 [Lactococcus phage KSY1]                                 | YP_0014690<br>49                | 68/81/0                           | 5.00E-130 | Deoxyadenosine kinase (EC 2.7.1.76) / Deoxyguanosine kinase (EC 2.7.1.113)       |
| orf_19     | 12293      | 13048     | +      | gp052 [Lactococcus phage KSY1]                                 | YP_0014690<br>50                | 54/72/0                           | 2.00E-92  | NrdR-regulated deoxyribonucleotide transporter, PnuC-like                        |
| orf_20     | 13120      | 13398     | +      | None                                                           |                                 |                                   |           | hypothetical protein                                                             |
| orf_21     | 13402      | 13650     | +      | glutaredoxin [Mycobacterium abscessus]                         | WP_020724<br>515                | 43/60/1                           | 8.00E-13  | hypothetical protein                                                             |
| orf_22     | 13734      | 14771     | +      | hypothetical protein [Bacillus sp. YP1]                        | WP_043940<br>300                | 35/57/21                          | 1.00E-46  | hypothetical protein                                                             |
| orf_23     | 14831      | 15685     | +      | hypothetical protein THICB2_640135 [Thiomonas sp. CB2]         | CDW95294                        | 42/62/1                           | 2.00E-08  | hypothetical protein                                                             |
| orf_24     | 15678      | 16322     | +      | None                                                           |                                 |                                   |           | hypothetical protein                                                             |
| orf_25     | 16306      | 16473     | +      | None                                                           |                                 |                                   |           | hypothetical protein                                                             |
| orf_26     | 16574      | 17542     | +      | bacteriophage related protein [Bacillus subtilis]              | WP_013603<br>304                | 42/60/26                          | 1.00E-67  | phage protein                                                                    |
| orf_27     | 17625      | 18107     | +      | None                                                           |                                 |                                   |           | hypothetical protein                                                             |

| Feature ID | Gene Start | Gene Stop | Strand | blastp Best-Hit cut-off (0.001)                                                                | Best-Hit<br>Accession<br>Number | %Identity<br>/Similarity<br>/Gaps | E-value   | RAST Function Prediction                                        |
|------------|------------|-----------|--------|------------------------------------------------------------------------------------------------|---------------------------------|-----------------------------------|-----------|-----------------------------------------------------------------|
| orf_28     | 18107      | 18535     | +      | None                                                                                           |                                 |                                   |           | hypothetical protein                                            |
| orf_29     | 18606      | 19676     | +      | ATP/GTP binding protein [Bacillus subtilis]                                                    | WP_013603<br>308                | 48/67/9                           | 5.00E-110 | ATP/GTP binding protein                                         |
| orf_30     | 19781      | 20350     | +      | None                                                                                           |                                 |                                   |           | hypothetical protein                                            |
| orf_31     | 20350      | 20607     | +      | None                                                                                           |                                 |                                   |           | hypothetical protein                                            |
| orf_32     | 20667      | 20813     | +      | None                                                                                           |                                 |                                   |           | hypothetical protein                                            |
| orf_33     | 20803      | 21543     | +      | None                                                                                           |                                 |                                   |           | hypothetical protein                                            |
| orf_34     | 21583      | 21810     | +      | None                                                                                           |                                 |                                   |           | hypothetical protein                                            |
| orf_35     | 21822      | 22064     | +      | hypothetical protein [Enterococcus faecalis]                                                   | WP_016622<br>890                | 68/81/0                           | 4.00E-14  | hypothetical protein                                            |
| orf_36     | 22077      | 22304     | +      | None                                                                                           |                                 |                                   |           | hypothetical protein                                            |
| orf_37     | 22399      | 22611     | +      | hypothetical protein EFP_gp142 [Enterococcus phage phiEF24C]                                   | YP_0015042<br>51                | 62/79/1                           | 2.00E-20  | Phage protein                                                   |
| orf_38     | 22626      | 23000     | +      | None                                                                                           |                                 |                                   |           | hypothetical protein                                            |
| orf_39     | 23034      | 23537     | +      | bacteriophage related protein [Bacillus subtilis]                                              | WP_013603<br>315                | 41/64/6                           | 3.00E-31  | phage protein                                                   |
| orf_40     | 23534      | 25114     | +      | replicative DNA helicase [Bacillus subtilis]                                                   | WP_020846<br>144                | 53/73/8                           | 0         | Replicative DNA helicase (DnaB) (EC 3.6.4.12)                   |
| orf_41     | 25126      | 26175     | +      | bacteriophage related protein [Bacillus subtilis]                                              | WP_013603<br>317                | 50/68/6                           | 1.00E-111 | Phage toprim domain containing protein, YorJ B.subtilis homolog |
| orf_42     | 26186      | 28012     | +      | single-stranded DNA exonuclease [Bacillus subtilis]                                            | WP_020846<br>146                | 40/57/30                          | 2.00E-105 | Single-stranded-DNA-specific exonuclease RecJ (EC 3.1.-.-)      |
| orf_43     | 28109      | 28711     | +      | None                                                                                           |                                 |                                   |           | hypothetical protein                                            |
| orf_44     | 28726      | 29109     | +      | None                                                                                           |                                 |                                   |           | hypothetical protein                                            |
| orf_45     | 29102      | 29572     | +      | None                                                                                           |                                 |                                   |           | hypothetical protein                                            |
| orf_46     | 29670      | 29798     | +      | None                                                                                           |                                 |                                   |           | hypothetical protein                                            |
| orf_47     | 29881      | 30075     | +      | None                                                                                           |                                 |                                   |           | hypothetical protein                                            |
| orf_48     | 30098      | 30244     | +      | None                                                                                           |                                 |                                   |           | hypothetical protein                                            |
| orf_49     | 30246      | 30446     | +      | None                                                                                           |                                 |                                   |           | hypothetical protein                                            |
| orf_50     | 30519      | 31034     | +      | None                                                                                           |                                 |                                   |           | hypothetical protein                                            |
| orf_51     | 31028      | 31873     | +      | thymidylate synthase, partial [Rhizobium leguminosarum]                                        | WP_032998<br>484                | 38/57/2                           | 3.00E-34  | Thymidylate synthase (EC 2.1.1.45)                              |
| orf_52     | 31902      | 32318     | +      | MULTISPECIES: dUTP diphosphatase [Clostridiales]                                               | WP_004083<br>327                | 54/71/0                           | 2.00E-44  | Deoxyuridine 5'-triphosphate nucleotidohydrolase (EC 3.6.1.23)  |
| orf_53     | 32328      | 33386     | +      | beta glucosyl transferase [Serratia phage PS2]                                                 | YP_0090300<br>87                | 42/63/10                          | 3.00E-90  | b-gt beta glucosyl transferase                                  |
| orf_54     | 33458      | 33982     | +      | MULTISPECIES: ribonuclease HI [Lactobacillus]                                                  | WP_025013<br>129                | 45/63/3                           | 6.00E-37  | Ribonuclease HI (EC 3.1.26.4)                                   |
| orf_55     | 33979      | 34941     | +      | beta-1,6-galactofuranosyltransferase [Leuconostoc gelidum]                                     | WP_010015<br>365                | 21/58/18                          | 2.00E-27  | Nucleotide sugar synthetase-like protein                        |
| orf_56     | 34943      | 35188     | +      | None                                                                                           |                                 |                                   |           | hypothetical protein                                            |
| orf_57     | 35181      | 35372     | +      | None                                                                                           |                                 |                                   |           | hypothetical protein                                            |
| orf_58     | 35474      | 36082     | +      | thymidine kinase [Lactobacillus mali]                                                          | WP_010078<br>319                | 45/62/11                          | 4.00E-42  | Thymidine kinase (EC 2.7.1.21)                                  |
| orf_59     | 36084      | 36326     | +      | hypothetical protein T211_08215 [Lactococcus lactis subsp. lactis bv. diacetylactis str. LD61] | ESK79055                        | 58/58/0                           | 3.00E-08  | hypothetical protein                                            |

| Feature ID | Gene Start | Gene Stop | Strand | blastp Best-Hit cut-off (0.001)                                              | Best-Hit<br>Accession<br>Number | %Identity<br>/Similarity<br>/Gaps | E-value   | RAST Function Prediction                                       |
|------------|------------|-----------|--------|------------------------------------------------------------------------------|---------------------------------|-----------------------------------|-----------|----------------------------------------------------------------|
| orf_60     | 36337      | 36552     | +      | None                                                                         |                                 |                                   |           | hypothetical protein                                           |
| orf_61     | 36654      | 36842     | +      | None                                                                         |                                 |                                   |           | hypothetical protein                                           |
| orf_62     | 36925      | 40791     | +      | DNA polymerase III alpha subunit [Bacillus subtilis]                         | WP_020846<br>153                | 47/67/33                          | 0         | DNA polymerase III alpha subunit (EC 2.7.7.7)                  |
| orf_63     | 40861      | 41115     | +      | None                                                                         |                                 |                                   |           | hypothetical protein                                           |
| orf_64     | 41115      | 41384     | +      | None                                                                         |                                 |                                   |           | hypothetical protein                                           |
| orf_65     | 41693      | 41884     | +      | None                                                                         |                                 |                                   |           | hypothetical protein                                           |
| orf_66     | 41896      | 42204     | +      | None                                                                         |                                 |                                   |           | hypothetical protein                                           |
| orf_67     | 42194      | 42739     | +      | None                                                                         |                                 |                                   |           | hypothetical protein                                           |
| orf_68     | 42741      | 43028     | +      | None                                                                         |                                 |                                   |           | hypothetical protein                                           |
| orf_69     | 43045      | 43323     | +      | None                                                                         |                                 |                                   |           | hypothetical protein                                           |
| orf_70     | 43387      | 43623     | +      | hypothetical protein [Bacillus thuringiensis]                                | WP_001009<br>047                | 51/64/7                           | 3.00E-14  | hypothetical protein                                           |
| orf_71     | 43626      | 44327     | +      | dUTP diphosphatase [Enterococcus villorum]                                   | WP_010750<br>123                | 45/56/61                          | 8.00E-50  | Deoxyuridine 5'-triphosphate nucleotidohydrolase (EC 3.6.1.23) |
| orf_72     | 44327      | 44620     | +      | None                                                                         |                                 |                                   |           | hypothetical protein                                           |
| orf_73     | 44617      | 45240     | +      | guanylate kinase/L-type calcium channel region [Bacillus subtilis]           | WP_009968<br>548                | 37/56/11                          | 7.00E-29  | Guanylate kinase (EC 2.7.4.8)                                  |
| orf_74     | 45240      | 45815     | +      | rusA family endodeoxyribonuclease [Bacillus subtilis]                        | WP_013603<br>335                | 39/61/1                           | 9.00E-36  | non-essential protein                                          |
| orf_75     | 45796      | 46125     | +      | None                                                                         |                                 |                                   |           | hypothetical protein                                           |
| orf_76     | 46206      | 46748     | +      | None                                                                         |                                 |                                   |           | hypothetical protein                                           |
| orf_77     | 46978      | 47127     | +      | None                                                                         |                                 |                                   |           | hypothetical protein                                           |
| orf_78     | 47230      | 47577     | +      | None                                                                         |                                 |                                   |           | hypothetical protein                                           |
| orf_79     | 47658      | 48293     | +      | None                                                                         |                                 |                                   |           | hypothetical protein                                           |
| orf_80     | 48307      | 48504     | +      | None                                                                         |                                 |                                   |           | hypothetical protein                                           |
| orf_81     | 48501      | 48704     | +      | None                                                                         |                                 |                                   |           | hypothetical protein                                           |
| orf_82     | 48705      | 48911     | +      | None                                                                         |                                 |                                   |           | hypothetical protein                                           |
| orf_83     | 48960      | 50900     | +      | subunit B of ATP-hydrolyzing DNA topoisomerase [Bacillus subtilis]           | WP_013603<br>341                | 50/69/22                          | 0         | Topoisomerase IV subunit B (EC 5.99.1.-)                       |
| orf_84     | 50983      | 51192     | +      | None                                                                         |                                 |                                   |           | hypothetical protein                                           |
| orf_85     | 51193      | 53178     | +      | DNA gyrase/topoisomerase IV, subunit A [Bacillus subtilis]                   | WP_009968<br>555                | 40/61/28                          | 7.00E-154 | Topoisomerase IV subunit A (EC 5.99.1.-)                       |
| orf_86     | 53329      | 53478     | +      | None                                                                         |                                 |                                   |           | hypothetical protein                                           |
| orf_87     | 53558      | 53746     | +      | None                                                                         |                                 |                                   |           | hypothetical protein                                           |
| orf_88     | 53921      | 54640     | +      | Aggregation promoting factor [Catallicoccus marimammalium]                   | WP_009490<br>292                | 54/63/2                           | 6.00E-33  | Aggregation promoting factor                                   |
| orf_89     | 54772      | 54975     | +      | None                                                                         |                                 |                                   |           | hypothetical protein                                           |
| orf_90     | 55083      | 55289     | +      | hypothetical protein EfaCPT1_gp47 [Enterococcus phage EfaCPT1]               | YP_0091038<br>64                | 97/97/0                           | 2.00E-39  | hypothetical protein                                           |
| orf_91     | 55283      | 55600     | +      | hypothetical protein CO47_0131 [Enterococcus phage AUEF3]                    | AHN83302                        | 96/99/0                           | 3.00E-65  | hypothetical protein                                           |
| orf_92     | 55640      | 55807     | +      | hypothetical protein EFP_gp137 [Enterococcus phage phiEF24C]                 | YP_0015042<br>46                | 80/90/0                           | 2.00E-19  | Phage protein                                                  |
| orf_93     | 55902      | 56075     | +      | hypothetical protein HMPREF9087_1257 [Enterococcus casseliflavus ATCC 12755] | EGC69869                        | 44/68/0                           | 6.00E-04  | hypothetical protein                                           |

| Feature ID | Gene Start | Gene Stop | Strand | blastp Best-Hit cut-off (0.001)                                                                                     | Best-Hit<br>Accession<br>Number | %Identity<br>/Similarity<br>/Gaps | E-value   | RAST Function Prediction                                                      |
|------------|------------|-----------|--------|---------------------------------------------------------------------------------------------------------------------|---------------------------------|-----------------------------------|-----------|-------------------------------------------------------------------------------|
| orf_94     | 56076      | 56279     | +      | None                                                                                                                |                                 |                                   |           | hypothetical protein                                                          |
| orf_95     | 56280      | 56540     | +      | None                                                                                                                |                                 |                                   |           | hypothetical protein                                                          |
| orf_96     | 56541      | 56753     | +      | None                                                                                                                |                                 |                                   |           | hypothetical protein                                                          |
| orf_97     | 56754      | 57161     | +      | hypothetical protein EnPhEFRM31_gp06<br>[Enterococcus phage EFRM31]                                                 | YP_0043066<br>34                | 58/77/1                           | 4.00E-47  | Phage tail length tape-measure<br>protein                                     |
| orf_98     | 57194      | 57400     | +      | None                                                                                                                |                                 |                                   |           | hypothetical protein                                                          |
| orf_99     | 57390      | 57794     | +      | None                                                                                                                |                                 |                                   |           | hypothetical protein                                                          |
| orf_100    | 57787      | 57993     | +      | None                                                                                                                |                                 |                                   |           | hypothetical protein                                                          |
| orf_101    | 58416      | 58607     | +      | None                                                                                                                |                                 |                                   |           | hypothetical protein                                                          |
| orf_102    | 58642      | 58854     | +      | None                                                                                                                |                                 |                                   |           | hypothetical protein                                                          |
| orf_103    | 58930      | 59094     | +      | None                                                                                                                |                                 |                                   |           | hypothetical protein                                                          |
| orf_104    | 59094      | 59651     | +      | None                                                                                                                |                                 |                                   |           | hypothetical protein                                                          |
| orf_105    | 60672      | 59695     | -      | site specific recombinase [Bacillus subtilis]                                                                       | WP_013603<br>353                | 64/82/0                           | 3.00E-150 | prophage LambdaBa02, site-<br>specific recombinase, phage<br>integrase family |
| orf_106    | 61881      | 60739     | -      | lysine [Enterococcus phage IME-EF4]                                                                                 | YP_0090043<br>53                | 53/64/28                          | 4.00E-115 | N-acetylmuramoyl-L-alanine<br>amidase (EC 3.5.1.28)                           |
| orf_107    | 62327      | 61962     | -      | lysin protein [Lactobacillus fabifermentans]                                                                        | WP_033613<br>708                | 40/57/2                           | 8.00E-04  | hypothetical protein                                                          |
| orf_108    | 62686      | 62342     | -      | None                                                                                                                |                                 |                                   |           | hypothetical protein                                                          |
| orf_109    | 63062      | 62664     | -      | None                                                                                                                |                                 |                                   |           | hypothetical protein                                                          |
| orf_110    | 64679      | 63108     | -      | hypothetical protein [Enterococcus faecalis]<br>hypothetical protein WOC_00151 [Enterococcus<br>faecalis EnGen0357] | WP_025193<br>464                | 32/45/103                         | 5.00E-61  | hypothetical protein                                                          |
| orf_111    | 66627      | 64699     | -      | phage minor structural protein [Enterococcus<br>malodoratus]                                                        | EOJ87326<br>973                 | 29/47/104                         | 1.00E-65  | hypothetical protein                                                          |
| orf_112    | 69221      | 66627     | -      | phage tail protein [Enterococcus faecalis]                                                                          | WP_010738<br>112                | 49/69/18                          | 1.00E-163 | FIG00629079: hypothetical protein                                             |
| orf_113    | 70012      | 69218     | -      | tail protein [Enterococcus faecium]                                                                                 | WP_023895<br>243                | 48/65/5                           | 5.00E-78  | hypothetical protein<br>Phage tail length tape-measure<br>protein             |
| orf_114    | 73818      | 70012     | -      | None                                                                                                                |                                 |                                   | 0         | hypothetical protein                                                          |
| orf_115    | 74097      | 73846     | -      | None                                                                                                                |                                 |                                   |           | hypothetical protein                                                          |
| orf_116    | 74404      | 74072     | -      | hypothetical protein [Eubacterium<br>acidaminophilum]                                                               | WP_025436<br>582                | 38/59/4                           | 4.00E-09  | hypothetical protein                                                          |
| orf_117    | 75147      | 74530     | -      | phage major tail protein, phi13 family<br>[Brevibacillus agri]                                                      | WP_005826<br>684                | 44/60/2                           | 4.00E-45  | Phage major tail protein phi13                                                |
| orf_118    | 75550      | 75173     | -      | None                                                                                                                |                                 |                                   |           | hypothetical protein                                                          |
| orf_119    | 76002      | 75553     | -      | hypothetical protein [Geobacillus vulcani]                                                                          | WP_031405<br>270                | 33/53/25                          | 2.00E-08  | hypothetical protein                                                          |
| orf_120    | 76357      | 75995     | -      | hypothetical protein [Veillonella sp. CAG:933]                                                                      | WP_021841<br>991                | 35/50/2                           | 4.00E-08  | hypothetical protein                                                          |
| orf_121    | 76758      | 76354     | -      | head-tail connector protein [Staphylococcus<br>phage vB_SepS_SEP9]                                                  | YP_0090076<br>76                | 39/60/6                           | 3.00E-18  | hypothetical protein                                                          |

| Feature ID | Gene Start | Gene Stop | Strand | blastp Best-Hit cut-off (0.001)                                 | Best-Hit<br>Accession<br>Number | %Identity<br>/Similarity<br>/Gaps | E-value   | RAST Function Prediction                                          |
|------------|------------|-----------|--------|-----------------------------------------------------------------|---------------------------------|-----------------------------------|-----------|-------------------------------------------------------------------|
| orf_122    | 77787      | 76915     | -      | hypothetical protein [Lactobacillus paracasei]                  | WP_025376<br>065                | 49/67/11                          | 2.00E-96  | prophage pi2 protein 34                                           |
| orf_123    | 79238      | 78036     | -      | major capsid protein [Lactobacillus phage ATCC 8014-B2]         | AFU63091                        | 41/57/41                          | 6.00E-91  | Gene Transfer Agent capsid protein;<br>Phage major capsid protein |
| orf_124    | 80406      | 79228     | -      | phage major capsid protein [Bacillus subtilis]                  | WP_020846<br>131                | 45/66/10                          | 6.00E-41  | Phage head maturation protease                                    |
| orf_125    | 81713      | 80433     | -      | phage portal protein, HK97 family [Bacillus subtilis]           | WP_009968<br>694                | 44/62/16                          | 2.00E-108 | Phage portal protein                                              |
| orf_126    | 83436      | 81730     | -      | terminase [Bacillus sp. YP1]                                    | WP_043940<br>336                | 64/80/7                           | 0         | Phage terminase, large subunit                                    |
| orf_127    | 83510      | 83626     | +      | None                                                            |                                 |                                   |           | hypothetical protein                                              |
| orf_128    | 84017      | 83748     | -      | None                                                            |                                 |                                   |           | hypothetical protein                                              |
| orf_129    | 84674      | 84183     | -      | small subunit of P27 family phage terminase [Bacillus subtilis] | WP_013603<br>375                | 60/76/0                           | 3.00E-64  | Phage-related protein                                             |
| orf_130    | 85094      | 84687     | -      | HNH restriction endonuclease domain protein [Bacillus subtilis] | WP_020846<br>133                | 53/69/2                           | 8.00E-37  | hypothetical protein                                              |
| orf_131    | 85376      | 85531     | +      | None                                                            |                                 |                                   |           | hypothetical protein                                              |
| orf_132    | 85521      | 86381     | +      | None                                                            |                                 |                                   |           | hypothetical protein                                              |

ϕVFW genome annotation

| Feature ID | Gene Start | Gene Stop | Strand | blastp Best-Hit cut-off (0.001)                                               | Best-Hit<br>Accession<br>Number | %Identity<br>/Similarity<br>/Gaps | E-value    | RAST Function Prediction                                                         |
|------------|------------|-----------|--------|-------------------------------------------------------------------------------|---------------------------------|-----------------------------------|------------|----------------------------------------------------------------------------------|
| orf_1      | 953        | 1159      | +      | None                                                                          |                                 |                                   |            | hypothetical protein                                                             |
| orf_2      | 1163       | 2761      | +      | None                                                                          |                                 |                                   |            | hypothetical protein                                                             |
| orf_3      | 2847       | 4811      | +      | hypothetical protein [Weissella oryzae]                                       | WP_027699<br>797                | 36/55/44                          | 1.00E-104  | RecD-like DNA helicase YrrC                                                      |
| orf_4      | 4822       | 5316      | +      | None                                                                          |                                 |                                   |            | hypothetical protein                                                             |
| orf_5      | 5524       | 5646      | +      | None                                                                          |                                 |                                   |            | hypothetical protein                                                             |
| orf_6      | 5756       | 6067      | +      | None                                                                          |                                 |                                   |            | hypothetical protein                                                             |
| orf_7      | 6064       | 6501      | +      | None                                                                          |                                 |                                   |            | hypothetical protein                                                             |
| orf_8      | 6501       | 6755      | +      | None                                                                          |                                 |                                   |            | hypothetical protein                                                             |
| orf_9      | 6758       | 6994      | +      | None                                                                          |                                 |                                   |            | hypothetical protein                                                             |
| orf_10     | 7027       | 8313      | +      | hypothetical protein [Bacillus sp. YP1]                                       | WP_043940<br>297                | 35/58/20                          | 3E-68      | DNA ligase, phage-associated                                                     |
| orf_11     | 8329       | 8520      | +      | None                                                                          |                                 |                                   |            | hypothetical protein                                                             |
| orf_12     | 8684       | 8899      | +      | None                                                                          |                                 |                                   |            | hypothetical protein                                                             |
| orf_13     | 8990       | 9193      | +      | None                                                                          |                                 |                                   |            | hypothetical protein                                                             |
| orf_14     | 9214       | 9426      | +      | None                                                                          |                                 |                                   |            | hypothetical protein                                                             |
| orf_15     | 9410       | 9820      | +      | None                                                                          |                                 |                                   |            | hypothetical protein                                                             |
| orf_16     | 9917       | 10465     | +      | Rossmann fold nucleotide-binding protein [Enterococcus durans]                | WP_005877<br>211                | 45/63/6                           | 5E-42      | Lysine decarboxylase family                                                      |
| orf_17     | 10462      | 10650     | +      | None                                                                          |                                 |                                   |            | hypothetical protein                                                             |
| orf_18     | 10651      | 11277     | +      | nucleoside deoxyribosyltransferase [Lactococcus lactis]                       | WP_014573<br>106                | 49/65/4                           | 5.00E-41   | Purine trans deoxyribosylase (Nucleoside deoxyribosyltransferase-I) (EC 2.4.2.6) |
| orf_19     | 11368      | 12204     | +      | gp051 [Lactococcus phage KSY1]                                                | YP_0014690<br>49                | 68/81/0                           | 6.00E-130  | Deoxyadenosine kinase (EC 2.7.1.76) / Deoxyguanosine kinase (EC 2.7.1.113)       |
| orf_20     | 12226      | 12981     | +      | gp052 [Lactococcus phage KSY1]                                                | YP_0014690<br>50                | 53/72/0                           | 7E-92      | NrdR-regulated deoxyribonucleotide transporter, PnuC-like                        |
| orf_21     | 13053      | 13331     | +      | None                                                                          |                                 |                                   |            | hypothetical protein                                                             |
| orf_22     | 13335      | 13583     | +      | glutaredoxin [Mycobacterium abscessus]                                        | WP_020724<br>515                | 43/59/5                           | 8.00E-13   | hypothetical protein                                                             |
| orf_23     | 13667      | 14704     | +      | hypothetical protein [Bacillus sp. YP1]<br>hypothetical protein THICB2_640135 | WP_043940<br>300                | 35/56/21                          | 1.00E-46   | hypothetical protein                                                             |
| orf_24     | 14764      | 15618     | +      | [Thiomonas sp. CB2]                                                           | CDW95294                        | 42/62/1                           | 0.00000002 | hypothetical protein                                                             |
| orf_25     | 15611      | 16255     | +      | None                                                                          |                                 |                                   |            | hypothetical protein                                                             |
| orf_26     | 16239      | 16406     | +      | None                                                                          |                                 |                                   |            | hypothetical protein                                                             |
| orf_27     | 16507      | 17475     | +      | bacteriophage related protein [Bacillus subtilis]                             | WP_013603<br>304                | 42/60/26                          | 1E-67      | phage protein                                                                    |
| orf_28     | 17558      | 18037     | +      | None                                                                          |                                 |                                   |            | hypothetical protein                                                             |

| Feature ID | Gene Start | Gene Stop | Strand | blastp Best-Hit cut-off (0.001)                              | Best-Hit<br>Accession<br>Number | %Identity<br>/Similarity<br>/Gaps | E-value   | RAST Function Prediction                                        |
|------------|------------|-----------|--------|--------------------------------------------------------------|---------------------------------|-----------------------------------|-----------|-----------------------------------------------------------------|
| orf_29     | 18037      | 18465     | +      | None                                                         |                                 |                                   |           | hypothetical protein                                            |
| orf_30     | 18539      | 19609     | +      | ATP/GTP binding protein [Bacillus subtilis]                  | WP_013603<br>308                | 47/67/9                           | 3.00E-109 | ATP/GTP binding protein                                         |
| orf_31     | 19713      | 20282     | +      | None                                                         |                                 |                                   |           | hypothetical protein                                            |
| orf_32     | 20282      | 20539     | +      | None                                                         |                                 |                                   |           | hypothetical protein                                            |
| orf_33     | 20536      | 20745     | +      | None                                                         |                                 |                                   |           | hypothetical protein                                            |
| orf_34     | 20735      | 21475     | +      | hypothetical protein [Paenibacillus pinihumi]                | WP_036708<br>774.1              | 39/59/0                           | 0.00006   | hypothetical protein                                            |
| orf_35     | 21515      | 21742     | +      | None                                                         |                                 |                                   |           | hypothetical protein                                            |
| orf_36     | 21754      | 21996     | +      | hypothetical protein [Enterococcus faecalis]                 | WP_016622<br>890                | 68/81/0                           | 4.00E-14  | hypothetical protein                                            |
| orf_37     | 22009      | 22236     | +      | None                                                         |                                 |                                   |           | hypothetical protein                                            |
| orf_38     | 22331      | 22543     | +      | hypothetical protein EFP_gp142 [Enterococcus phage phiEF24C] | YP_0015042<br>51                | 62/79/1                           | 2.00E-20  | Phage protein                                                   |
| orf_39     | 22558      | 22932     | +      | None                                                         |                                 |                                   |           | hypothetical protein                                            |
| orf_40     | 22966      | 23469     | +      | bacteriophage related protein [Bacillus subtilis]            | WP_013603<br>315                | 41/64/6                           | 3.00E-31  | phage protein                                                   |
| orf_41     | 23466      | 25046     | +      | hypothetical protein [Bacillus sp. YP1]                      | WP_043940<br>316                | 53/73/8                           | 0         | Replicative DNA helicase (DnaB) (EC 3.6.4.12)                   |
| orf_42     | 25058      | 26107     | +      | hypothetical protein [Bacillus subtilis]                     | WP_009968<br>513                | 50/68/6                           | 7.00E-112 | Phage toprim domain containing protein, YorJ B.subtilis homolog |
| orf_43     | 26118      | 27944     | +      | single-stranded DNA exonuclease [Bacillus subtilis]          | WP_020846<br>146                | 40/57/30                          | 2.00E-105 | Single-stranded-DNA-specific exonuclease RecJ (EC 3.1.-.-)      |
| orf_44     | 28041      | 28643     | +      | None                                                         |                                 |                                   |           | hypothetical protein                                            |
| orf_45     | 28658      | 29041     | +      | None                                                         |                                 |                                   |           | hypothetical protein                                            |
| orf_46     | 29034      | 29504     | +      | None                                                         |                                 |                                   |           | hypothetical protein                                            |
| orf_47     | 29602      | 29730     | +      | None                                                         |                                 |                                   |           | hypothetical protein                                            |
| orf_48     | 29813      | 30007     | +      | None                                                         |                                 |                                   |           | hypothetical protein                                            |
| orf_49     | 30030      | 30176     | +      | None                                                         |                                 |                                   |           | hypothetical protein                                            |
| orf_50     | 30178      | 30378     | +      | None                                                         |                                 |                                   |           | hypothetical protein                                            |
| orf_51     | 30451      | 30966     | +      | None                                                         |                                 |                                   |           | hypothetical protein                                            |
| orf_52     | 30960      | 31805     | +      | hypothetical protein [Chryseobacterium luteum]               | WP_034707<br>540                | 36/60/8                           | 7.00E-37  | Thymidylate synthase (EC 2.1.1.45)                              |
| orf_53     | 31834      | 32250     | +      | dUTP diphosphatase [Clostridiales]                           | WP_004083<br>327                | 54/71/0                           | 2.00E-44  | Deoxyuridine 5'-triphosphate nucleotidohydrolase (EC 3.6.1.23)  |
| orf_54     | 32260      | 33318     | +      | beta glucosyl transferase [Serratia phage PS2]               | YP_0090300<br>87                | 42/63/10                          | 4.00E-90  | b-gt beta glucosyl transferase                                  |
| orf_55     | 33390      | 33914     | +      | ribonuclease HI [Lactobacillus]                              | WP_025013<br>129                | 45/65/3                           | 6.00E-37  | Ribonuclease HI (EC 3.1.26.4)                                   |
| orf_56     | 33911      | 34873     | +      | hypothetical protein, partial [Leuconostoc citreum]          | WP_036069<br>825                | 30/50/43                          | 2.00E-29  | Nucleotide sugar synthetase-like protein                        |
| orf_57     | 34875      | 35120     | +      | None                                                         |                                 |                                   |           | hypothetical protein                                            |
| orf_58     | 35113      | 35304     | +      | None                                                         |                                 |                                   |           | hypothetical protein                                            |
| orf_59     | 35406      | 36014     | +      | thymidine kinase [Lactobacillus mali]                        | WP_010078<br>319.1              | 45/62/5                           | 5.00E-43  | Thymidine kinase (EC 2.7.1.21)                                  |

| Feature ID | Gene Start | Gene Stop | Strand | blastp Best-Hit cut-off (0.001)                                                                | Best-Hit<br>Accession<br>Number | %Identity<br>/Similarity<br>/Gaps | E-value  | RAST Function Prediction                                       |
|------------|------------|-----------|--------|------------------------------------------------------------------------------------------------|---------------------------------|-----------------------------------|----------|----------------------------------------------------------------|
| orf_60     | 36016      | 36258     | +      | hypothetical protein T211_08215 [Lactococcus lactis subsp. lactis bv. diacetylactis str. LD61] | ESK79055                        | 58/58/0                           | 3.00E-09 | hypothetical protein                                           |
| orf_61     | 36269      | 36484     | +      | None                                                                                           |                                 |                                   |          | hypothetical protein                                           |
| orf_62     | 36585      | 36773     | +      | None                                                                                           |                                 |                                   |          | hypothetical protein                                           |
| orf_63     | 36856      | 40722     | +      | DNA polymerase III alpha subunit [Bacillus subtilis]                                           | WP_020846<br>153                | 47/67/33                          | 0        | DNA polymerase III alpha subunit (EC 2.7.7.7)                  |
| orf_64     | 40792      | 41046     | +      | None                                                                                           |                                 |                                   |          | hypothetical protein                                           |
| orf_65     | 41046      | 41315     | +      | None                                                                                           |                                 |                                   |          | hypothetical protein                                           |
| orf_66     | 41625      | 41816     | +      | None                                                                                           |                                 |                                   |          | hypothetical protein                                           |
| orf_67     | 41828      | 42136     | +      | None                                                                                           |                                 |                                   |          | hypothetical protein                                           |
| orf_68     | 42126      | 42671     | +      | None                                                                                           |                                 |                                   |          | hypothetical protein                                           |
| orf_69     | 42673      | 42960     | +      | None                                                                                           |                                 |                                   |          | hypothetical protein                                           |
| orf_70     | 42977      | 43255     | +      | None                                                                                           |                                 |                                   |          | hypothetical protein                                           |
| orf_71     | 43319      | 43555     | +      | hypothetical protein [Bacillus thuringiensis]                                                  | WP_001009<br>047                | 51/64/7                           | 3E-14    | hypothetical protein                                           |
| orf_72     | 43558      | 44259     | +      | dUTP diphosphatase [Enterococcus villorum]                                                     | WP_010750<br>123                | 45/56/61                          | 8.00E-50 | Deoxyuridine 5'-triphosphate nucleotidohydrolase (EC 3.6.1.23) |
| orf_73     | 44259      | 44552     | +      | None                                                                                           |                                 |                                   |          | hypothetical protein                                           |
| orf_74     | 44549      | 45172     | +      | guanylate kinase/L-type calcium channel region [Bacillus subtilis]                             | WP_009968<br>548                | 37/56/11                          | 3E-28    | Guanylate kinase (EC 2.7.4.8)                                  |
| orf_75     | 45172      | 45747     | +      | rusA family endodeoxyribonuclease [Bacillus subtilis]                                          | WP_013603<br>335                | 39/61/1                           | 9.00E-36 | non-essential protein                                          |
| orf_76     | 45728      | 46057     | +      | None                                                                                           |                                 |                                   |          | hypothetical protein                                           |
| orf_77     | 46138      | 46680     | +      | None                                                                                           |                                 |                                   |          | hypothetical protein                                           |
| orf_78     | 46909      | 47058     | +      | None                                                                                           |                                 |                                   |          | hypothetical protein                                           |
| orf_79     | 47162      | 47509     | +      | None                                                                                           |                                 |                                   |          | hypothetical protein                                           |
| orf_80     | 47590      | 48225     | +      | RNA polymerase subunit sigma-70 [Bacillus subtilis]                                            | WP_009968<br>495                | 29/55/18                          | 4E-17    | hypothetical protein                                           |
| orf_81     | 48240      | 48449     | +      | None                                                                                           |                                 |                                   |          | hypothetical protein                                           |
| orf_82     | 48446      | 48655     | +      | None                                                                                           |                                 |                                   |          | hypothetical protein                                           |
| orf_83     | 48705      | 48866     | +      | None                                                                                           |                                 |                                   |          | hypothetical protein                                           |
| orf_84     | 48867      | 50807     | +      | DNA topoisomerase [Bacillus subtilis]                                                          | WP_009968<br>556                | 49/69/22                          | 0        | Topoisomerase IV subunit B (EC 5.99.1.-)                       |
| orf_85     | 50890      | 51099     | +      | None                                                                                           |                                 |                                   |          | hypothetical protein                                           |
| orf_86     | 51100      | 53085     | +      | hypothetical protein, partial [Bacillus sp. YP1]                                               | WP_043940<br>343                | 41/61/24                          | 3E-153   | Topoisomerase IV subunit A (EC 5.99.1.-)                       |
| orf_87     | 53236      | 53385     | +      | None                                                                                           |                                 |                                   |          | hypothetical protein                                           |
| orf_88     | 53465      | 53653     | +      | None                                                                                           |                                 |                                   |          | hypothetical protein                                           |
| orf_89     | 53831      | 54550     | +      | Aggregation promoting factor [Catallicoccus marimammalium]                                     | WP_009490<br>292                | 54/64/2                           | 9E-34    | Aggregation promoting factor                                   |
| orf_90     | 54676      | 54879     | +      | None                                                                                           |                                 |                                   |          | hypothetical protein                                           |
| orf_91     | 54985      | 55293     | +      | hypothetical protein EfaCPT1_gp58 [Enterococcus phage EfaCPT1]                                 | YP_0091038<br>75                | 78/83/0                           | 7E-48    | Phage protein                                                  |
| orf_92     | 55306      | 55476     | +      | hypothetical protein EFP_gp137 [Enterococcus phage phiEF24C]                                   | YP_0015042<br>46                | 80/90/0                           | 6.00E-20 | Phage protein                                                  |
| orf_93     | 55489      | 55701     | +      | None                                                                                           |                                 |                                   |          | hypothetical protein                                           |



| Feature ID | Gene Start | Gene Stop | Strand | blastp Best-Hit cut-off (0.001)                                  | Best-Hit<br>Accession<br>Number | %Identity<br>/Similarity<br>/Gaps | E-value    | RAST Function Prediction                                                |
|------------|------------|-----------|--------|------------------------------------------------------------------|---------------------------------|-----------------------------------|------------|-------------------------------------------------------------------------|
| orf_94     | 55859      | 56035     | +      | None                                                             |                                 |                                   |            | hypothetical protein                                                    |
| orf_95     | 56032      | 56424     | +      | None                                                             |                                 |                                   |            | hypothetical protein                                                    |
| orf_96     | 56455      | 56667     | +      | None                                                             |                                 |                                   |            | hypothetical protein                                                    |
| orf_97     | 56657      | 57061     | +      | None                                                             |                                 |                                   |            | hypothetical protein                                                    |
| orf_98     | 57054      | 57260     | +      | None                                                             |                                 |                                   |            | hypothetical protein                                                    |
| orf_99     | 57685      | 57876     | +      | None                                                             |                                 |                                   |            | hypothetical protein                                                    |
| orf_100    | 57911      | 58123     | +      | None                                                             |                                 |                                   |            | hypothetical protein                                                    |
| orf_101    | 58198      | 58362     | +      | None                                                             |                                 |                                   |            | hypothetical protein                                                    |
| orf_102    | 58362      | 58919     | +      | None                                                             |                                 |                                   |            | hypothetical protein                                                    |
| orf_103    | 59942      | 58965     | -      | hypothetical protein [Bacillus sp. YP1]                          | WP_043940<br>287                | 64/82/0                           | 2E-150     | prophage LambdaBa02, site-specific recombinase, phage integrase family  |
| orf_104    | 61151      | 60009     | -      | lysine [Enterococcus phage IME-EF4]                              | YP_0090043<br>53                | 53/64/28                          | 5E-115     | N-acetylmuramoyl-L-alanine amidase (EC 3.5.1.28)                        |
| orf_105    | 61597      | 61232     | -      | lysis protein [Lactobacillus fabifermentans]                     | WP_033613<br>708                | 40/57/2                           | 0.0008     | hypothetical protein                                                    |
| orf_106    | 61956      | 61612     | -      | hypothetical protein [Listeria rocourtae]                        | WP_036069<br>146.1              | 35/58/0                           | 0.0002     | hypothetical protein                                                    |
| orf_107    | 62332      | 61934     | -      | None                                                             |                                 |                                   |            | hypothetical protein                                                    |
| orf_108    | 63946      | 62378     | -      | hypothetical protein [Enterococcus faecalis]                     | WP_025193<br>464                | 31/46/105                         | 3.00E-60   | hypothetical protein                                                    |
| orf_109    | 65894      | 63966     | -      | hypothetical protein WOC_00151 [Enterococcus faecalis EnGen0357] | EOJ87326<br>29                  | 47/92                             | 5.00E-68   | hypothetical protein                                                    |
| orf_110    | 68487      | 65908     | -      | phage minor structural protein, partial [Enterococcus faecalis]  | WP_033656<br>155                | 49/67/14                          | 5.00E-165  | Phage endopeptidase                                                     |
| orf_111    | 69278      | 68484     | -      | phage tail protein [Enterococcus faecalis]                       | WP_023895<br>112                | 48/65/5                           | 1E-77      | hypothetical protein                                                    |
| orf_112    | 73084      | 69278     | -      | tail protein [Enterococcus faecium]                              | WP_002318<br>243                | 33/53/122                         | 0          | Phage tail length tape-measure protein                                  |
| orf_113    | 73363      | 73112     | -      | None                                                             |                                 |                                   |            | hypothetical protein                                                    |
| orf_114    | 73670      | 73338     | -      | hypothetical protein [Eubacterium acidaminophilum]               | WP_025436<br>582                | 38/59/4                           | 4.00E-09   | hypothetical protein                                                    |
| orf_115    | 74412      | 73795     | -      | phage major tail protein, phi13 family [Brevibacillus agri]      | WP_005826<br>684                | 44/60/2                           | 2.00E-45   | Phage major tail protein phi13                                          |
| orf_116    | 74815      | 74438     | -      | None                                                             |                                 |                                   |            | hypothetical protein                                                    |
| orf_117    | 75267      | 74818     | -      | hypothetical protein [Geobacillus vulcani]                       | WP_031405<br>270                | 33/53/25                          | 0.00000002 | hypothetical protein                                                    |
| orf_118    | 75622      | 75260     | -      | hypothetical protein [Veillonella sp. CAG:933]                   | WP_021841<br>991                | 35/50/2                           | 0.00000004 | hypothetical protein                                                    |
| orf_119    | 76023      | 75619     | -      | head-tail connector protein [Staphylococcus phage vB_SepS_SEP9]  | YP_0090076<br>76                | 38/60/6                           | 2.00E-18   | hypothetical protein                                                    |
| orf_120    | 77067      | 76180     | -      | hypothetical protein [Lactobacillus paracasei]                   | WP_025376<br>065                | 49/67/11                          | 1.00E-96   | prophage pi2 protein 34                                                 |
| orf_121    | 78567      | 77365     | -      | major capsid protein [Lactobacillus phage ATCC 8014-B2]          | AFU63091<br>41                  | 57/41                             | 6E-91      | Gene Transfer Agent capsid protein; Phage major capsid protein #Fam0006 |

| Feature ID | Gene Start | Gene Stop | Strand | blastp Best-Hit cut-off (0.001)                                 | Best-Hit Accession Number | %Identity /Similarity /Gaps | E-value   | RAST Function Prediction       |
|------------|------------|-----------|--------|-----------------------------------------------------------------|---------------------------|-----------------------------|-----------|--------------------------------|
| orf_122    | 79735      | 78557     | -      | phage major capsid protein [Bacillus subtilis]                  | WP_020846<br>131          | 45/66/10                    | 4.00E-41  | Phage head maturation protease |
| orf_123    | 81042      | 79762     | -      | phage portal protein, HK97 family [Bacillus subtilis]           | WP_009968<br>694          | 44/62/16                    | 2.00E-108 | Phage portal protein           |
| orf_124    | 82765      | 81059     | -      | terminase [Bacillus sp. YP1]                                    | WP_043940<br>336          | 64/80/7                     | 0.00E+00  | Phage terminase, large subunit |
| orf_125    | 82839      | 82955     | +      | None                                                            |                           |                             |           | hypothetical protein           |
| orf_126    | 83346      | 83077     | -      | hypothetical protein, partial [Enterococcus faecalis]           | WP_033918<br>705          | 65/73/5                     | 2E-27     | hypothetical protein           |
| orf_127    | 84003      | 83512     | -      | small subunit of P27 family phage terminase [Bacillus subtilis] | WP_013603<br>375          | 60/76/0                     | 3.00E-64  | Phage-related protein          |
| orf_128    | 84423      | 84016     | -      | hypothetical protein [Bacillus subtilis]                        | WP_013603<br>376          | 54/70/3                     | 2.00E-38  | hypothetical protein           |
| orf_129    | 84705      | 84860     | +      | None                                                            |                           |                             |           | hypothetical protein           |
| orf_130    | 84850      | 85710     | +      | None                                                            |                           |                             |           | hypothetical protein           |

#### Coding Sequence Annotation

Replication/Biosynthesis

DNA restriction modification

Host cell Lysis

Structural morphogenesis

DNA packaging

Hypothetical
