# Supplementary material for: Molecular Basis for Lytic Bacteriophage Resistance in Enterococci
Source: PubMed Central journal article supplement (PMC4999554; doi:10.1128/mbio.01304-16), 2016-08-30
Supplement: mbo004162963st2.pdf [file mbo004162963st2.pdf]

Table S2. Spontaneous mutations in EF0858 (PIP<sub>EF</sub>) result in phage resistance.

| Phage used for isolation | Clone  | Reference position | Variation type | Reference  | Variation    | Variation freq. (%) | Fold coverage | Amino acid change | ϕVPE25 and ϕVFW resistance |
|--------------------------|--------|--------------------|----------------|------------|--------------|---------------------|---------------|-------------------|----------------------------|
| ϕVPE25                   | APENS1 | 815,579            | ISE            |            | 5' insertion | -                   | -             | Frameshift        | +                          |
|                          | APENS2 | 816,873 – 816,882  | DIP            | ATACGATTGA | -            | 100                 | 509           | Frameshift        | +                          |
|                          | APENS3 | 817,761            | DIP            | C          | -            | 100                 | 417           | Frameshift        | +                          |
|                          | VPENS1 | 816,873 – 816,882  | DIP            | ATACGATTGA | -            | 100                 | 546           | Frameshift        | +                          |
|                          | VPENS2 | 816,600            | DIP            | G          | -            | 100                 | 539           | Frameshift        | +                          |
|                          | VPENS3 | 816,785            | SNP            | G          | T            | 98.9                | 471           | Glu → Stop        | +                          |
| ϕVFW                     | VFWNS1 | 816,873 – 816,882  | DIP            | ATACGATTGA | -            | 100                 | 606           | Frameshift        | +                          |
|                          | VFWNS2 | 815,741            | SNP            | G          | T            | 99.6                | 263           | Gly → Stop        | +                          |
|                          | VFWNS3 | 815,741            | SNP            | G          | T            | 100                 | 412           | Gly → Stop        | +                          |

ISE – Insertion sequence element, DIP – Deletion or insertion polymorphism, SNP – Single nucleotide polymorphism
