# Supplementary material for: Molecular Basis for Lytic Bacteriophage Resistance in Enterococci
Source: PubMed Central journal article supplement (PMC4999554; doi:10.1128/mbio.01304-16), 2016-08-30
Supplement: mbo004162963st3.pdf [file mbo004162963st3.pdf]

Table S3. Sewage PIP read mapping to clade specific PIP<sub>EF</sub> variable region

| Clade specific read matches* | Sample (% of reads mapped) [average fold coverage] |                      |                      |                      |
|------------------------------|----------------------------------------------------|----------------------|----------------------|----------------------|
|                              | V583                                               | EBOX                 | P1                   | P2                   |
| ARO1/DG - Clade 1            | (0.99)<br>[27.68]                                  | (1.83)<br>[75.08]    | (12.30)<br>[495.30]  | (23.96)<br>[994.39]  |
| Merz96 - Clade 2             | (0.61)<br>[14.10]                                  | (1.61)<br>[44.27]    | (0.89)<br>[27.47]    | (0.31)<br>[7.47]     |
| OG1RF - Clade 3              | (0.15)<br>[1.87]                                   | (0.21)<br>[5.12]     | (0.16)<br>[2.35]     | (0.09)<br>[1.48]     |
| V583 - Clade 4               | (76.98)<br>[3033.77]                               | (25.72)<br>[1536.97] | (46.25)<br>[1883.98] | (49.37)<br>[2062.34] |
| E1Sol - Clade 5              | (16.61)<br>[609.69]                                | (67.19)<br>[4185.29] | (22.27)<br>[864.08]  | (7.46)<br>[285.61]   |
| Unmatched reads              | 4.66                                               | 3.89                 | 18.12                | 18.80                |

\* Indicates only one representative member from each clade was used for the read mapping
