# Supplementary material for: Molecular Basis for Lytic Bacteriophage Resistance in Enterococci
Source: PubMed Central journal article supplement (PMC4999554; doi:10.1128/mbio.01304-16), 2016-08-30
Supplement: mbo004162963st4.pdf [file mbo004162963st4.pdf]

Table S4. Mutations conferring  $\phi$ VPE25 resistance in *E. faecalis* from gnotobiotic mouse feces

| Class of mutation                       | Position*     | Reference | Variation       | Result of mutation |
|-----------------------------------------|---------------|-----------|-----------------|--------------------|
| Nonsense (35 <sup>†</sup> )             | 815718        | G         | A               | W → stop codon     |
|                                         | 817799        | C         | T               | Q → stop codon     |
|                                         | 816467        | G         | T               | E → stop codon     |
|                                         | 815622        | G         | A               | W → stop codon     |
|                                         | 816491        | C         | T               | Q → stop codon     |
|                                         | 817073        | C         | T               | Q → stop codon     |
|                                         | 817419        | T         | A               | L → stop codon     |
| Deletion/Insertion (25 <sup>†</sup> )   | 815754        | C         | Deletion        | Frameshift         |
|                                         | 816095        | A         | Deletion        | Frameshift         |
|                                         | 818140        | G         | Deletion        | Frameshift         |
|                                         | 816467        | G         | Deletion        | Frameshift         |
|                                         | 815619-815620 | AT        | Insertion, AAT  | Frameshift         |
| Transposon insertion (20 <sup>†</sup> ) | 815641        | N/A       | IS256 insertion | Frameshift         |
|                                         | 815661        | N/A       | IS256 insertion | Frameshift         |
|                                         | 815610        | N/A       | IS256 insertion | Frameshift         |
|                                         | 816130        | N/A       | IS216 insertion | Frameshift         |

\*Position corresponds to genome coordinates of *E. faecalis* V583. <sup>†</sup> Percent frequency of the class of mutation
