# Supplementary material for: Molecular Basis for Lytic Bacteriophage Resistance in Enterococci
Source: PubMed Central journal article supplement (PMC4999554; doi:10.1128/mbio.01304-16), 2016-08-30
Supplement: mbo004162963st5.pdf [file mbo004162963st5.pdf]

Table S5. Bacterial strains, phages, plasmids and primers.

| Strains, phages, plasmids and primers | Characteristics and/or description                                                                                                                                                                               | Reference/source           |
|---------------------------------------|------------------------------------------------------------------------------------------------------------------------------------------------------------------------------------------------------------------|----------------------------|
| <i>Enterococcus faecalis</i>          |                                                                                                                                                                                                                  |                            |
| V583                                  | Human blood isolate; Vm <sup>R</sup> , Em <sup>R</sup> , Gm <sup>R</sup>                                                                                                                                         | (1)                        |
| ATCC29212                             | Human urine isolate; Quality control strain; Tc <sup>R</sup>                                                                                                                                                     | (2)                        |
| T1                                    | SS498; CDC reference strain,                                                                                                                                                                                     | (3)                        |
| T2                                    | Human urine isolate; Sapporo-603; Tc <sup>R</sup>                                                                                                                                                                | (3)                        |
| T3                                    | Human urine isolate; Sapporo-109; Tc <sup>R</sup>                                                                                                                                                                | (3)                        |
| T8                                    | Human urine isolate; Nagasaki-742; Tc <sup>R</sup> , Em <sup>R</sup>                                                                                                                                             | (3)                        |
| T11                                   | Human urine isolate; Sapporo-027;                                                                                                                                                                                | (3)                        |
| X98                                   | Infant fecal isolate; Lancefield H69D6                                                                                                                                                                           | (3)                        |
| Fly1                                  | Commensal isolate from <i>Drosophila</i>                                                                                                                                                                         | (3)                        |
| AR01/DG                               | Dog wound isolate; Vm <sup>R</sup> , Tc <sup>R</sup> , Em <sup>R</sup>                                                                                                                                           | (3)                        |
| DS5                                   | FDA strain PCI1326, Tc <sup>R</sup> , Em <sup>R</sup>                                                                                                                                                            | (3)                        |
| JH1                                   | Clinical isolate; Tc <sup>R</sup> , Em <sup>R</sup> , Gm <sup>R</sup>                                                                                                                                            | (3)                        |
| D6                                    | Pig isolate; Tc <sup>R</sup> , Em <sup>R</sup> , Gm <sup>R</sup>                                                                                                                                                 | (3)                        |
| ATCC4200                              | Human blood isolate; Patient with rheumatic fever                                                                                                                                                                | (3)                        |
| CH188                                 | Human liver isolate; Tc <sup>R</sup> , Em <sup>R</sup> , Gm <sup>R</sup> , Cm <sup>R</sup> , Ap <sup>R</sup>                                                                                                     | (3)                        |
| E1Sol                                 | Human fecal isolate; Solomon Islands                                                                                                                                                                             | (3)                        |
| HIP11704                              | Clinical isolate; Vm <sup>R</sup> , Em <sup>R</sup> , Gm <sup>R</sup>                                                                                                                                            | (3)                        |
| OG1RF                                 | Human oral isolate; Rf <sup>R</sup> , Fa <sup>R</sup>                                                                                                                                                            | (4)                        |
| Merz96                                | Human blood isolate; Vm <sup>R</sup> , Tc <sup>R</sup> , Em <sup>R</sup> , Gm <sup>R</sup>                                                                                                                       | (3)                        |
| BDU50                                 | ΔEF0858 PIP <sub>EF</sub> mutant of V583                                                                                                                                                                         | This study                 |
| BDU51                                 | PIP <sub>EF</sub> replacement strain; EFJG_01790 with EF0858 in E1Sol                                                                                                                                            | This study                 |
| BDU53                                 | EF0858 PIP <sub>EF</sub> variable region mutant in V583; Δaa 342-390                                                                                                                                             | This study                 |
| BDU54                                 | EF0858 PIP <sub>EF</sub> variable region mutant in V583; Δaa 391-439                                                                                                                                             | This study                 |
| BDU55                                 | EF0858 PIP <sub>EF</sub> variable region mutant in V583; Δaa 440-494                                                                                                                                             | This study                 |
| APENS1                                | Phage resistant mutant of V583; PIP <sub>EF</sub> 5' ISE                                                                                                                                                         | This study                 |
| APENS2                                | Phage resistant mutant of V583; PIP <sub>EF</sub> ATACGATTGA insertion                                                                                                                                           | This study                 |
| APENS3                                | Phage resistant mutant of V583; PIP <sub>EF</sub> nucleotide deletion frameshift                                                                                                                                 | This study                 |
| VPENS1                                | Phage resistant mutant of V583; PIP <sub>EF</sub> ATACGATTGA insertion                                                                                                                                           | This study                 |
| VPENS2                                | Phage resistant mutant of V583; PIP <sub>EF</sub> nucleotide deletion frameshift                                                                                                                                 | This study                 |
| VPENS3                                | Phage resistant mutant of V583; PIP <sub>EF</sub> nucleotide change; Glu to Stop                                                                                                                                 | This study                 |
| VFWNS1                                | Phage resistant mutant of V583; PIP <sub>EF</sub> ATACGATTGA insertion                                                                                                                                           | This study                 |
| VFWNS2                                | Phage resistant mutant of V583; PIP <sub>EF</sub> nucleotide change; Gly to Stop                                                                                                                                 | This study                 |
| VFWNS3                                | Phage resistant mutant of V583; PIP <sub>EF</sub> nucleotide change; Gly to stop                                                                                                                                 | This study                 |
| <i>Enterococcus faecium</i>           |                                                                                                                                                                                                                  |                            |
| Com12                                 | Human fecal isolate                                                                                                                                                                                              | (3)                        |
| Com15                                 | Human fecal isolate                                                                                                                                                                                              | (3)                        |
| 1,141,733                             | Human blood isolate                                                                                                                                                                                              | (3)                        |
| <i>Escherichia coli</i>               |                                                                                                                                                                                                                  |                            |
| TG1                                   | [F' <i>traD36 proAB lacIqZ ΔM15</i> ] <i>supE thi-1 Δ(lac-proAB) Δ(mcrB-hsdSM)5(rK - mK -)</i>                                                                                                                   | Lucigen                    |
| Phages                                |                                                                                                                                                                                                                  |                            |
| φVPE25                                | <i>Siphoviridae</i> ; Wastewater isolate                                                                                                                                                                         | This study                 |
| φVFW                                  | <i>Siphoviridae</i> ; Wastewater isolate                                                                                                                                                                         | This study                 |
| Plasmids                              |                                                                                                                                                                                                                  |                            |
| pLT06                                 | <i>E. faecalis</i> allelic exchange vector; Cm <sup>R</sup>                                                                                                                                                      | (5)                        |
| pLZ12                                 | Shuttle vector; pSH71 origin; Cm <sup>R</sup>                                                                                                                                                                    | (6)                        |
| pAT28-cat                             | Shuttle vector; pUC and pAMβ1 origins; Cm <sup>R</sup>                                                                                                                                                           | Rodrigues and Palmer, 2016 |
| pLTPIP                                | pLT06 with ΔEF0858 extending from +25 to +2649 bp with respect to the predicted start site; Cloned as a PstI-NcoI fragment; Allelic exchange vector for deletion of PIP <sub>EF</sub> in <i>E. faecalis</i> V583 | This study                 |
| pLTDPIPA                              | pLT06 with ΔEF0858 extending from +1024 to +1170 bp with respect to the predicted start site; Cloned as a XbaI-NcoI fragment; Allelic                                                                            | This study                 |

|              |                                                                                                                                                                                                                                                                                                                                  |            |
|--------------|----------------------------------------------------------------------------------------------------------------------------------------------------------------------------------------------------------------------------------------------------------------------------------------------------------------------------------|------------|
| pLTDPIPB     | exchange vector for $\Delta A$ truncation of PIP <sub>EF</sub> in <i>E. faecalis</i> V583 pLT06 with $\Delta EF0858$ extending from +1171 to +1317 bp with respect to the predicted start site; Clone as a XbaI-NcoI fragment; Allelic exchange vector for $\Delta B$ truncation of PIP <sub>EF</sub> in <i>E. faecalis</i> V583 | This study |
| pLTDPIPC     | pLT06 with $\Delta EF0858$ extending from +1318 to +1482 bp with respect to the predicted start site; Cloned as a XbaI-NcoI fragment; Allelic exchange vector for $\Delta C$ truncation of PIP <sub>EF</sub> in <i>E. faecalis</i> V583                                                                                          | This study |
| pLTPdV1      | pLT06 with EF0858 from +76 bp to +2751 with respect to the predicted start site; Cloned as a XbaI-NcoI fragment; Allelic replacement vector used to generate transgenic PIP <sub>EF</sub> in <i>E. faecalis</i> E1Sol                                                                                                            | This study |
| pLZPIP       | pLZ12 carrying V583 PIP <sub>EF</sub> from -180 to +2780 with respect to the predicted start site; Complementation plasmid; Cloned as a PstI-BglII fragment                                                                                                                                                                      | This study |
| pLZEV        | pLZ12 carrying chimeric PIP <sub>EF</sub> ; E1sol PIP <sub>EF</sub> from -180 to +1261 fused to V583 PIP <sub>EF</sub> from +1262 to +2769 bp with respect to the predicted start site; PIP swapping plasmid for <i>E. faecalis</i> ; Cloned as a PstI-BglII fragment                                                            | This study |
| pPBPIP       | pAT28-cat carrying V583 PIP <sub>EF</sub> from -180 to +2780 with respect to the predicted start site; PIP swapping plasmid for <i>E. faecium</i> ; Cloned as a KpnI fragment                                                                                                                                                    | This study |
| Primers      |                                                                                                                                                                                                                                                                                                                                  |            |
| EF0858L-F    | NNNNNNCTGCAGGATCAACAGAACTGGTAGAGGACTATC; Forward primer for the left homology fragment and for final overlap extension PCR to generate pLTPIP; PstI site                                                                                                                                                                         | This study |
| EF0858L-R    | CAGCTTTTTGTTTTTAATGGAATAAATGGCTCCATGTATTTTTTATA TGTTTCATAAAATCACCTGC; Reverse primer for the left homology fragment used to generate pLTPIP                                                                                                                                                                                      | This study |
| EF0858R-F    | GCAGGTGATTTTATGAAACATATAAAAAATACATGGAGCCATTTATT CCATTAACAAAACAAAAGCTG; Forward primer for the right homology fragment used to generate pLTPIP                                                                                                                                                                                    | This study |
| EF0858R-R    | NNNNNNCCATGGACGCAAACGTTGGCTGG; Reverse primer or the right homology fragment and for final overlap extension PCR to generate pLTPIP; NcoI site                                                                                                                                                                                   | This study |
| PIP_F3TruncA | NNNNNNTCTAGATTGATTGTGCCTTAATGATTATTCATCATTATA TGCA; Forward primer for the left homology fragment and for final overlap extension PCR to generate pLTDPIPA; XbaI site                                                                                                                                                            | This study |
| PIP_R1TruncA | TCCTAGGCTTTCAGACAGTTGTTGCTTGCCATCTAATGTGACATTC CCTAAATCATTGGC; Reverse primer for the left homology fragment used to generate pLTDPIPA                                                                                                                                                                                           | This study |
| PIP_F2TruncA | GCCAATGATTTAGGGAATGTCACATTAGATGGCAAGCAACAACTGT CTGAAAGCCTAGGA; Forward primer for the right homology fragment used to generate pLTDPIPA                                                                                                                                                                                          | This study |
| PIP_R3TruncA | NNNNNNCCATGGCCGTGCTGAAAATTGTTCCCGTTTAGAGAA; Reverse primer or the right homology fragment and for final overlap extension PCR to generate pLTDPIPA; NcoI site                                                                                                                                                                    | This study |
| PIP_F1TruncB | NNNNNNTCTAGAGCCGGGATTTATTTACCTAAAGATTTTTCCAAAG AT; Forward primer for the left homology fragment and for final overlap extension PCR to generate pLTDPIPB; XbaI site                                                                                                                                                             | This study |
| PIP_R1TruncB | CGCATTACATCAATGTTATCAACATCAGTTTTTAATCTAATTGCTT CTCTTTCTTCAACTGGTAAACGATG; Reverse primer for the left homology fragment used to generate pLTDPIPB                                                                                                                                                                                | This study |
| PIP_F2TruncB | CATCGTTTACCAGTTGAAGAAAGAGAAGCAATTAGATTAAAAACCTG ATGTTGATAACATTGATGTGAATGCG; Forward primer for the right homology fragment used to generate pLTDPIPB                                                                                                                                                                             | This study |
| PIP_R2TruncB | NNNNNNCCATGGCGCTTCAACATCTGGCATTCTCATTGAC; Reverse primer or the right homology fragment and for final overlap extension PCR to generate pLTDPIPB; NcoI site                                                                                                                                                                      | This study |
| PIP_F1TruncC | NNNNNNTCTAGATTCAATGATATTGGCTATGATATTGATAAAAACAT GGTTAGC; Forward primer for the left homology fragment and for final overlap extension PCR to generate pLTDPIPC; XbaI site                                                                                                                                                       | This study |
| PIP_R1TruncC | TTTGTGTTAGTTGACCTTGAGCGTTTTGGATAACTACAATACCATCAA TCGTATTCAATCTATTTATTGTGTC; Reverse primer for the left homology fragment used to generate pLTDPIPC                                                                                                                                                                              | This study |

|                 |                                                                                                                                                                         |            |
|-----------------|-------------------------------------------------------------------------------------------------------------------------------------------------------------------------|------------|
| PIP_F2TruncC    | GACACAATAAATAGATTGAATACGATTGATGGTATTGTAGTTATCC<br>AAAACGCTCAAGGTCAACTAAACAAA; Forward primer for the right<br>homology fragment used to generate pLTDPIPC               | This study |
| PIP_R2TruncC    | NNNNNNCCATGGACACAAAGCTGTATAGAATGGCGTACTTGC;<br>Reverse primer for the right homology fragment and for final overlap<br>extension PCR to generate pLTDPIPC; NcoI site    | This study |
| PIPswap-F1      | NNNNNN <u>CTAGAT</u> TTTTTGATTGTTGCCTTAATGATTATTCCATCA;<br>Forward primer used to amplify the <i>E. faecalis</i> V583 PIP <sub>EF</sub> region in<br>pLTPdV1; XbaI site | This study |
| PIPswap-R1      | NNNNNNCCATGGATAAAGAATTGCACCGCCAATACTAAAGAC;<br>Reverse primer used to amplify the <i>E. faecalis</i> V583 PIP <sub>EF</sub> region in<br>pLTPdV1; NcoI site             | This study |
| PIPcompLZ-F1    | NNNNNNCTGCAGCCAGAAGCCATTGATGAAGTTAAAC; Forward<br>primer used to clone the <i>E. faecalis</i> V583 PIP <sub>EF</sub> open reading frame in<br>pLZPIP; PstI site         | This study |
| PIPcompLZ-R1    | NNNNNNAGATCTATTGCCAAAAAGTCAAAGCAAGAGC; Reverse<br>primer used to clone the <i>E. faecalis</i> V583 PIP <sub>EF</sub> open reading frame in<br>pLZPIP; BglII site        | This study |
| PIPF1-E         | NNNNNNCTGCAGCCAGAAGCCATTGATGAAGTTAAACAAGTC;<br>Forward primer for the left homology in pLZEV; PstI site                                                                 | This study |
| PIPR1-E         | AATCGTATTCAATCTATTTATTGTGTCTTGTAATCAGTGTTACCTG<br>TGGCTTCTGTATTTGCGT; Reverse primer for the left homology<br>fragment in pLZEV; BglII site                             | This study |
| PIPF2-V         | ACGCAAATACAAGAAGCCACAGGTAACACTGATTTACAAGACACAA<br>TAAATAGATTGAATACGATT; Forward primer for the right homology<br>fragment in pLZEV                                      | This study |
| PIPR2-V         | NNNNNNAGATCTATTGCCAAAAAGTCAAAGCAAGAGC; Reverse<br>primer for the right homology fragment in pLZEV; BglII site                                                           | This study |
| PIPcomp28-F1    | NNNNNNGGTACCCAGAGCCATTGATGAAGTTAAAC; Forward<br>primer used to clone the <i>E. faecalis</i> V583 PIP <sub>EF</sub> open reading frame in<br>pPBPIP; KpnI site           | This study |
| PIPcomp28-R1    | NNNNNNGGTACCATTTGCCAAAAAGTCAAAGCAAGAGC; Reverse<br>primer used to clone the <i>E. faecalis</i> V583 PIP <sub>EF</sub> open reading frame in<br>pPBPIP; KpnI site        | This study |
| PIPvaruniv-F    | GTCACATTAGATGGCGCYAMTMAATTG; Forward primer to amplify<br>the PIP <sub>EF</sub> variable region from sewage samples                                                     | This study |
| PIPvaruniv-R    | CTTGAGCGTTTTGGATGGTASRAYTTAYTTTG; Reverse primer to<br>amplify the PIP <sub>EF</sub> variable region from sewage samples                                                | This study |
| PIPorf-F        | GCCATTGATGAAGTTAAACAAGTCGTTTCGG; Forward primer used<br>to amplify the PIP <sub>EF</sub> from <i>E. faecalis</i> mouse intestinal isolates                              | This study |
| PIPorf-R        | GCTGTTCGTTTTTCCAATTTACGACGTTTC; Reverse primer used to<br>amplify the PIP <sub>EF</sub> from <i>E. faecalis</i> mouse intestinal isolates                               | This study |
| VFW_2_For       | TATTTTGAGTTTTATTTTGTGTTT; Forward methyl primer for $\phi$ VFW<br>bisulfite sequencing                                                                                  | This study |
| VFW_2_Rev       | AATCCCAATCCTATTTACCATATTC; Reverse methyl primer for $\phi$ VFW<br>bisulfite sequencing                                                                                 | This study |
| VPE25_1_For     | GTTGGATAGTAGTAAAAATTTAAATATTTG; Forward methyl primer<br>for $\phi$ VPE25 bisulfite sequencing                                                                          | This study |
| VPE25_1_Rev     | ACTAACATTAATCCAAAACCAATAAAAC; Reverse methyl primer for<br>$\phi$ VPE25 bisulfite sequencing                                                                            | This study |
| OG1RF_11844_For | GATATTTGTAGGTATATTTTGTGTTT; Forward methyl primer for <i>E.</i><br><i>faecalis</i> OG1RF bisulfite sequencing                                                           | This study |
| OG1RF_11844_Rev | AAATATTACTTTTCATTAATAAAACC; Reverse methyl primer for <i>E.</i><br><i>faecalis</i> OG1RF bisulfite sequencing                                                           | This study |
| mtail-F1        | GACGCATTCTATGCGGACGA; Forward qPCR primer for amplifying<br>orf_117 transcripts from $\phi$ VPE25                                                                       | This study |
| mtail-R1        | AATGCTACACGAGGGGCAAC; Reverse qPCR primer for amplifying<br>orf_117 transcripts from $\phi$ VPE25                                                                       | This study |
| PGRP-F1         | TAAAGCACAGTTGGCGCAAG; Forward qPCR primer for amplifying<br>orf_106 transcripts from $\phi$ VPE25                                                                       | This study |
| PGRP-R1         | GCGCGTCTGGGTTTTGTAG; Reverse qPCR primer for amplifying<br>orf_106 transcripts from $\phi$ VPE25                                                                        | This study |

|            |                                                                                                                   |            |
|------------|-------------------------------------------------------------------------------------------------------------------|------------|
| capsid-F1  | TGCGTGACATCGCTTACTCT; Forward qPCR primer for amplifying orf_123 transcripts from $\phi$ VPE25                    | This study |
| capsid-R1  | AGTTACCGTCTTCACGAGCA; Reverse qPCR primer for amplifying orf_123 transcripts from $\phi$ VPE25                    | This study |
| EFrecA-F1  | GATGGTGAGATGGGAGCGAG; Forward qPCR primer for amplifying <i>recA</i> transcripts from <i>E. faecalis</i> V583     | This study |
| EFrecA-R1  | CACGTCCACCAGGAGTTGTT; Reverse qPCR primer for amplifying <i>recA</i> transcripts from <i>E. faecalis</i> V583     | This study |
| 733recA-F1 | CACAGCCTGACACAGGAGAA; Forward qPCR primer for amplifying <i>recA</i> transcripts from <i>E. faecium</i> 1,141,733 | This study |
| 733recA-R1 | ACGTGCTTGTAACCCGACAT; Reverse qPCR primer for amplifying <i>recA</i> transcripts from <i>E. faecium</i> 1,141,733 | This study |

---

Vm<sup>R</sup> - vancomycin resistance; Tc<sup>R</sup> - tetracycline resistance; Em<sup>R</sup> - erythromycin resistance; Gm<sup>R</sup> - Gentamicin resistance; Cm<sup>R</sup> - chloramphenicol resistant; Rf<sup>R</sup> - rifampicin resistance; Fa<sup>R</sup> - fusidic acid resistance; Ap<sup>R</sup> - ampicillin resistance; Restriction sites are underlined

1. **Paulsen IT, Banerjee L, Myers GS, Nelson KE, Seshadri R, Read TD, Fouts DE, Eisen JA, Gill SR, Heidelberg JF, Tettelin H, Dodson RJ, Umayam L, Brinkac L, Beanan M, Daugherty S, DeBoy RT, Durkin S, Kolonay J, Madupu R, Nelson W, Vamathevan J, Tran B, Upton J, Hansen T, Shetty J, Khouri H, Utterback T, Radune D, Ketchum KA, Dougherty BA, Fraser CM.** 2003. Role of mobile DNA in the evolution of vancomycin-resistant *Enterococcus faecalis*. *Science* **299**:2071-2074.
2. **Kim EB, Kopit LM, Harris LJ, Marco ML.** 2012. Draft genome sequence of the quality control strain *Enterococcus faecalis* ATCC 29212. *J Bacteriol* **194**:6006-6007.
3. **Palmer KL, Carniol K, Manson JM, Heiman D, Shea T, Young S, Zeng Q, Gevers D, Feldgarden M, Birren B, Gilmore MS.** 2010. High-quality draft genome sequences of 28 *Enterococcus* sp. isolates. *J Bacteriol* **192**:2469-2470.
4. **Bourgogne A, Garsin DA, Qin X, Singh KV, Sillanpaa J, Yerrapragada S, Ding Y, Dugan-Rocha S, Buhay C, Shen H, Chen G, Williams G, Muzny D, Maadani A, Fox KA, Gioia J, Chen L, Shang Y, Arias CA, Nallapareddy SR, Zhao M, Prakash VP, Chowdhury S, Jiang H, Gibbs RA, Murray BE, Highlander SK, Weinstock GM.** 2008. Large scale variation in *Enterococcus faecalis* illustrated by the genome analysis of strain OG1RF. *Genome Biol* **9**:R110.
5. **Thurlow LR, Thomas VC, Hancock LE.** 2009. Capsular polysaccharide production in *Enterococcus faecalis* and contribution of CpsF to capsule serospecificity. *J Bacteriol* **191**:6203-6210.

6. **Perez-Casal J, Caparon MG, Scott JR.** 1991. Mry, a trans-acting positive regulator of the M protein gene of *Streptococcus pyogenes* with similarity to the receptor proteins of two-component regulatory systems. *J Bacteriol* **173**:2617-2624.
